# Supplementary material for: Comparative efficacy and safety of surgical and invasive treatments for adults with degenerative lumbar spinal stenosis: protocol for a network meta-analysis and systematic review
Source: PubMed Central journal article supplement — BMJ Open. 2019 Apr 4;9(4):e024752. doi: 10.1136/bmjopen-2018-024752 (PMC6500367; doi:10.1136/bmjopen-2018-024752), 2019-04-04
Supplement: bmjopen-2018-024752supp001.pdf [file bmjopen-2018-024752supp001.pdf]

Database: Ovid MEDLINE(R) Epub Ahead of Print, In-Process & Other Non-Indexed Citations, Ovid MEDLINE(R) Daily and Ovid MEDLINE(R) <1946 to Present>

Search Strategy:

- 1 exp spinal stenosis/
- 2 canal stenosis.mp.
- 3 (spin\* adj3 stenosis).mp.
- 4 (lumbar adj3 stenosis).mp.
- 5 (lateral adj3 stenosis).mp.
- 6 (central adj3 stenosis).mp.
- 7 (foramin\* adj3 stenosis).mp.
- 8 neurogenic claudication.mp.
- 9 exp radiculopathy/
- 10 Radiculopathy.mp.
- 11 radicular pain.mp.
- 12 lumbar radicular pain.mp.
- 13 exp spondylolisthesis/
- 14 Spondylolisthesis.mp.
- 15 (lumb\* adj5 spondyl\*).mp.
- 16 exp spondylosis/
- 17 Spondylosis.mp.
- 18 1 or 2 or 3 or 4 or 5 or 6 or 7 or 8 or 9 or 10 or 11 or 12 or 13 or 14 or 15 or 16 or  
17
- 19 exp general surgery/
- 20 Surgery.mp.
- 21 exp decompression, surgical/
- 22 decompres\* surgery.mp.
- 23 Decompression.mp.
- 24 (spin\* adj3 decompress\*).mp.
- 25 exp laminectomy/
- 26 Laminectom\*.mp.
- 27 Laminotom\*.mp.

28 Laminoplasty.mp.  
29 exp spinal fusion/  
30 (spin\* adj3 fusion).mp.  
31 (pedicle adj3 screw).mp.  
32 lumbar fusion.mp.  
33 vertebrae fusion.mp.  
34 vertebral fixation.mp.  
35 spinal fixation.mp.  
36 Spondylodesis.mp.  
37 Spondylosyndesis.mp.  
38 Arthrodesis.mp. or exp arthrodesis/  
39 (posterolateral adj3 fusion).mp.  
40 (interbody adj3 fusion).mp.  
41 (anterior adj3 fusion).mp.  
42 (posterior adj3 fusion).mp.  
43 (transforaminal adj3 fusion).mp.  
44 (transpsoas adj3 fusion).mp.  
45 (facet adj3 fusion).mp.  
46 (bone adj3 graft).mp.  
47 (fixation adj3 spin\*).mp.  
48 (pedicle adj3 fusion).mp.  
49 Graft.mp.  
50 (cage adj3 fusion).mp.  
51 (screw adj3 fusion).mp.  
52 Foraminotomy.mp. or exp foraminotomy/  
53 Foraminectomy.mp.  
54 exp surgical procedures, minimally invasive/  
55 minim\* invasive.mp.  
56 epidural.mp.  
57 intra-articular.mp.  
58 exp Anesthesia, Epidural/

- 59 Analgesia, Epidural/
- 60 exp Injections, Epidural/
- 61 exp Injections, Intra-Articular/
- 62 19 or 20 or 21 or 22 or 23 or 24 or 25 or 26 or 27 or 28 or 29 or 30 or 31 or 32 or 33  
or 34 or 35 or 36 or 37 or 38 or 39 or 40 or 41 or 42 or 43 or 44 or 45 or 46 or 47 or 48 or  
49 or 50 or 51 or 52 or 53 or 54 or 55 or 56 or 57 or 58 or 59 or 60 or 61
- 63 randomized controlled trial.pt.
- 64 controlled clinical trial.pt.
- 65 randomized.ab,ti.
- 66 placebo.ab,ti.
- 67 drug therapy.fs.
- 68 randomly.ab,ti.
- 69 trial.ab,ti.
- 70 groups.ab,ti.
- 71 63 or 64 or 65 or 66 or 67 or 68 or 69 or 70
- 72 (animals not (humans and animals)).sh.
- 73 71 not 72
- 74 18 and 62 and 73
